# Supplementary material
Source: PubMed Central journal article supplement (PMC6763255)
Supplement: jci-129-128531-s132.pdf [file jci-129-128531-s132.pdf]

1 **Supplemental Materials:**  
2 **Electronic cigarettes disrupt lung lipid homeostasis and innate immunity**  
3 **independent of nicotine**

4  
5 **Authors:** Matthew C. Madison<sup>1,2</sup>, Cameron T. Landers<sup>1,2</sup>, Bon-Hee Gu<sup>3</sup>, Cheng-Yen Chang<sup>1,2</sup>,  
6 Hui-Ying Tung<sup>3</sup>, Ran You<sup>3</sup>, Monica J. Hong<sup>1,3</sup>, Nima Baghaei<sup>1</sup>, Li-Zhen Song<sup>1</sup>, Paul Porter<sup>3</sup>,  
7 Nagireddy Putluri<sup>4</sup>, Ramiro Salas<sup>5</sup>, Brian E. Gilbert<sup>6</sup>, Ilya Levental<sup>7</sup>, Matthew J. Campen<sup>8</sup>, David  
8 B. Corry<sup>1-3,9,10</sup>, Farrah Kheradmand\*<sup>1-3,9,10</sup>

9  
10 **Affiliations:**

11 <sup>1</sup> Department of Medicine, Baylor College of Medicine, Houston, TX, USA.

12 <sup>2</sup> Interdepartmental Program in Translational Biology and Molecular Medicine, Baylor College  
13 of Medicine, Houston, TX, USA.

14 <sup>3</sup> Department of Pathology and Immunology, Baylor College of Medicine, Houston, TX, USA.

15 <sup>4</sup> Department of Molecular and Cell Biology, Baylor College of Medicine, Houston, TX, USA.

16 <sup>5</sup> Department of Psychiatry, Baylor College of Medicine, Houston, TX, USA.

17 <sup>6</sup> Department of Virology and Microbiology, Baylor College of Medicine, Houston, TX, USA.

18 <sup>7</sup> Department of Integrative Biology and Molecular Pharmacology, University of Texas Health  
19 Science Center, Houston, TX, USA.

20 <sup>8</sup> Department of Pharmaceutical Sciences, College of Pharmacy, University of New Mexico,  
21 Albuquerque, NM, USA

22 <sup>9</sup> Biology of Inflammation Center, Baylor College of Medicine, Houston, TX, USA.

23 <sup>10</sup> Center for Translational Research on Inflammatory Diseases (CTRID), Michael E. DeBakey  
24 VA Medical Center, Houston, TX, USA .

25

26 \*To whom correspondence should be addressed: Farrah Kheradmand, M.D. ([farrakh@bcm.edu](mailto:farrakh@bcm.edu))

27 1 Baylor Plaza Mailstop -M915A

28 Houston, TX 77030

29 (713) 798-8622

30

31

32

33

34

35

36

37

38

39

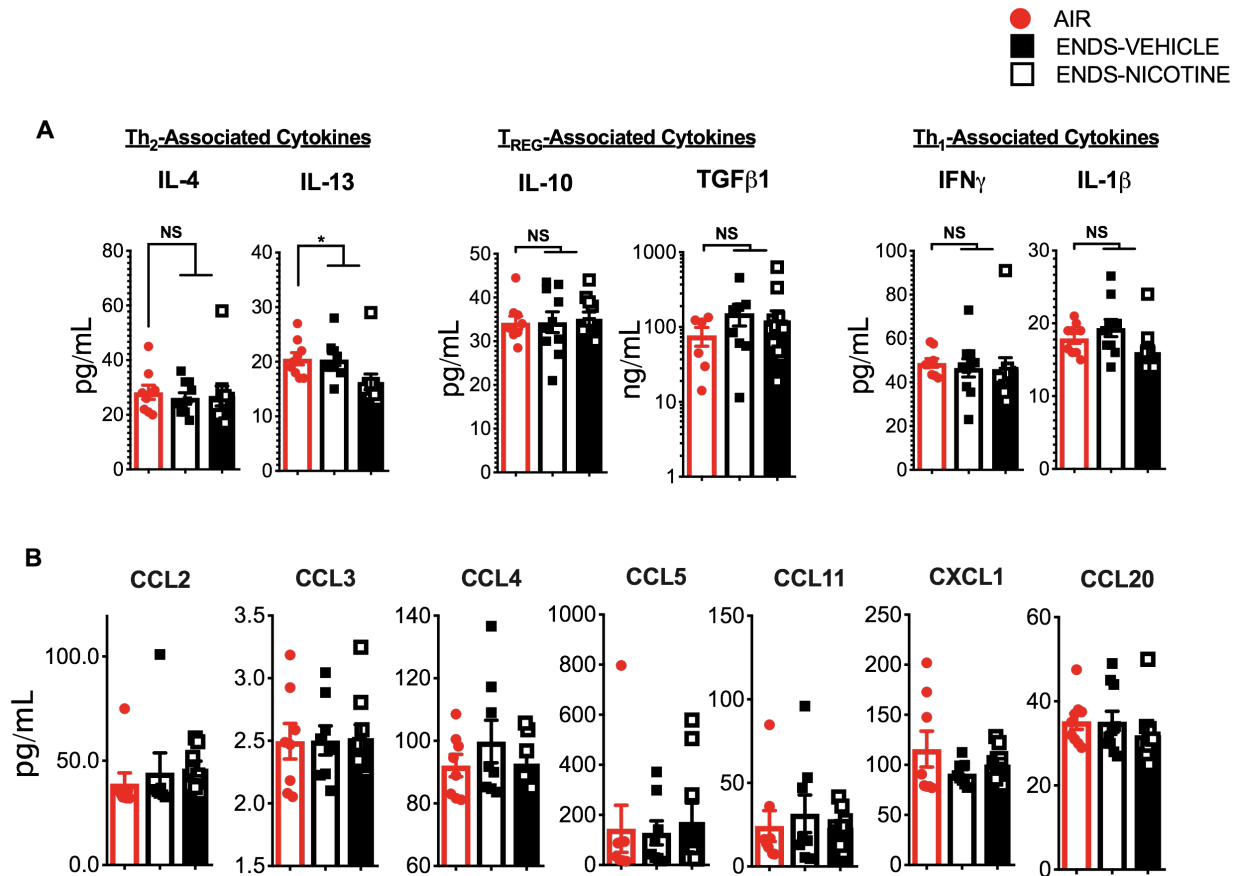

41  
 42 **Supplemental Figure 1. ENDS exposure does not encourage Th1, Th2, or Treg-associated cytokine**  
 43 **or chemokine profiles in the lung.** (A) Representative multiplex cytokine analyses for IL-4, IL-13, IL-  
 44 10, TGFβ1, IFNγ, and IL-1β from lung homogenate supernatant of mice exposed to AIR, ENDS-  
 45 VEHICLE, or ENDS-NICOTINE for a 4-month period. The quantified results are expressed as means ±  
 46 S.E.M. n=7 to 10 per group. Significance was determined by One-way ANOVA with a Bonferroni  
 47 correction for multiple comparisons. (B) Representative multiplex chemokine analyses for CCL2, CCL3,  
 48 CCL4, CCL5, CCL11, CXCL1, CCL20 from bronchoalveolar lavage supernatants of mice exposed to  
 49 AIR, ENDS-VEHICLE, or ENDS-NICOTINE for a 4-month period. The quantified results are expressed  
 50 as means ± S.E.M. n=7 to 10 per group.

51  
 52  
 53  
 54  
 55  
 56  
 57  
 58  
 59  
 60  
 61  
 62  
 63  
 64  
 65

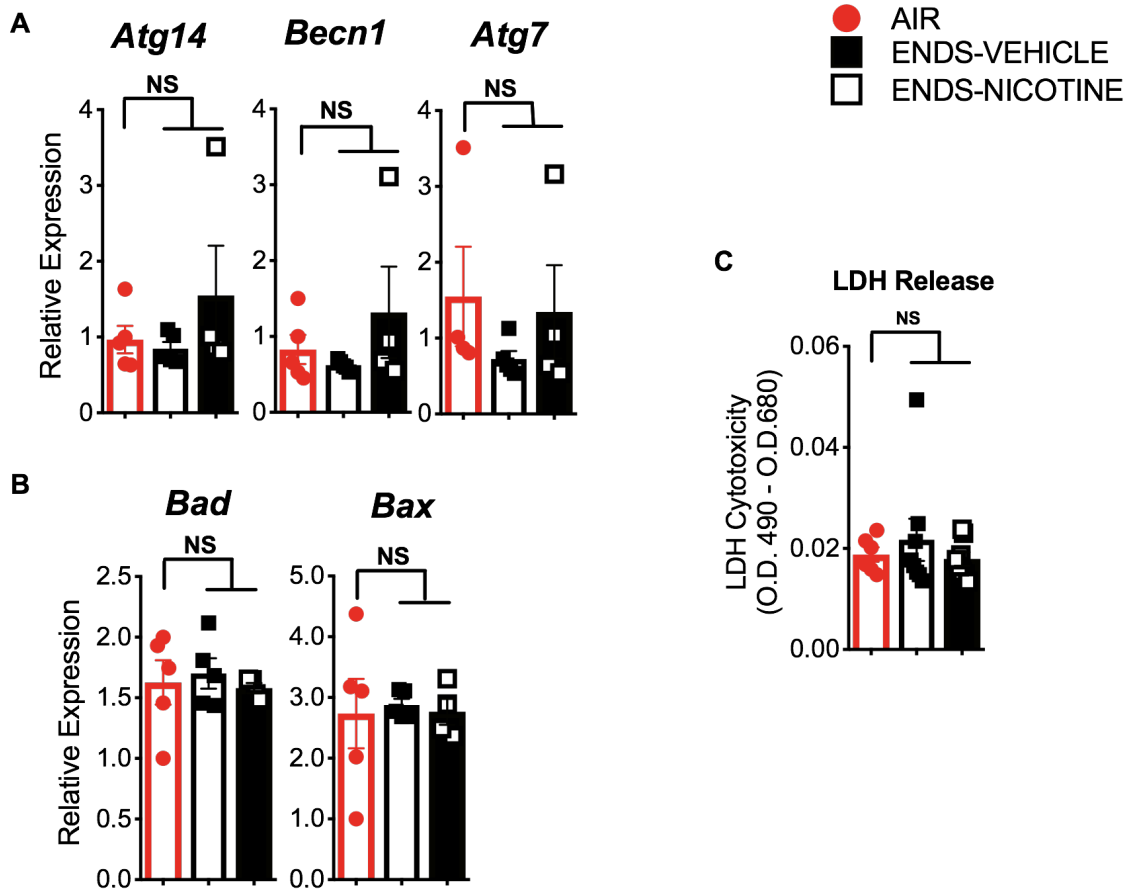

68  
69 **Supplemental Figure 2. BAL cells from ENDS-exposed mice fail to show increases in markers of**  
70 **apoptosis and autophagy.** (A) Representative gene expression analysis for autophagy mediators: *Atg7*,  
71 *Atg14*, and *Beclin1*. cDNA was generated from RNA derived from cells pelleted from BAL fluid. The  
72 quantified results are expressed as means  $\pm$  S.E.M.  $n \geq 4$  per group. Significance was determined by One-  
73 way ANOVA with a Bonferroni correction for multiple comparisons. (B) Representative gene expression  
74 analysis for pro-apoptotic mediators: *Bad* and *Bax*. cDNA was generated from RNA derived from cells  
75 pelleted from BAL fluid. The quantified results are expressed as means  $\pm$  S.E.M.  $n = 4$  to 6 per group.  
76 Significance was determined by One-way ANOVA with a Bonferroni correction for multiple  
77 comparisons. (C) Representative cytotoxicity analysis using a colorimetric, lactate dehydrogenase release  
78 assay with BAL fluid supernatant. The quantified results are expressed as means  $\pm$  S.E.M.  $n = 6$  to 7  
79 per group. Significance was determined by One-way ANOVA with a Bonferroni correction for multiple  
80 comparisons.

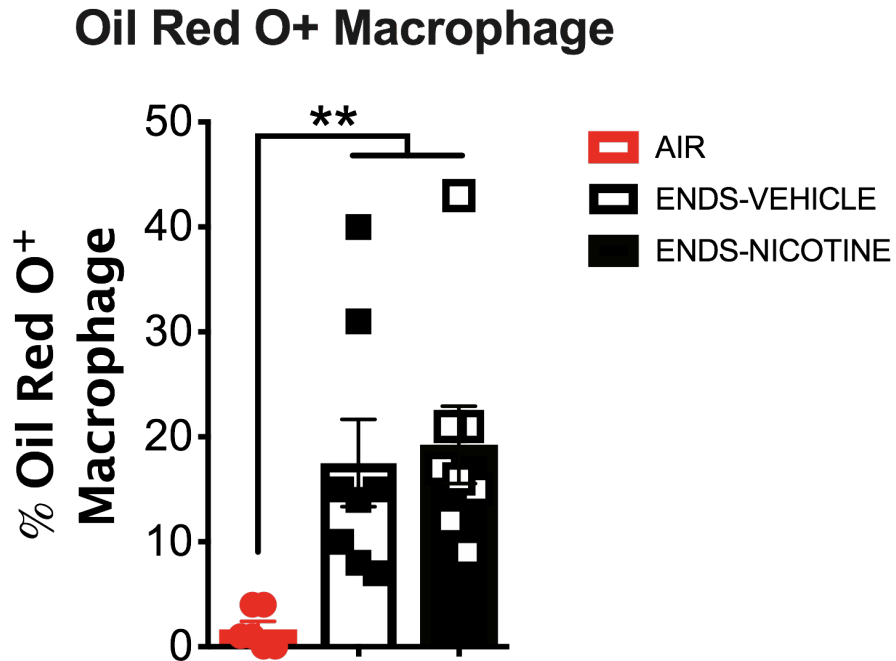

87  
88 **Supplemental Figure 3. BAL cells from ENDS-exposed mice exhibit significant Oil Red O positivity**  
89 **following 4-month exposure.** Representative Oil Red O quantification of macrophages from cytopsin  
90 preparations of bronchoalveolar lavage fluid from AIR, ENDS-VEHICLE, and ENDS-NICOTINE groups  
91 exposed for a 4-month period. The quantified results are expressed in terms of mean % oil red o positive  
92 macrophages  $\pm$  S.E.M. n=6 to 7 per group. Significance was determined by One-way ANOVA with a  
93 Bonferroni correction for multiple comparisons.

94  
95  
96  
97  
98  
99  
100  
101  
102  
103  
104  
105  
106  
107  
108  
109  
110  
111  
112  
113  
114  
115

116 Supplemental Figure 4.

117

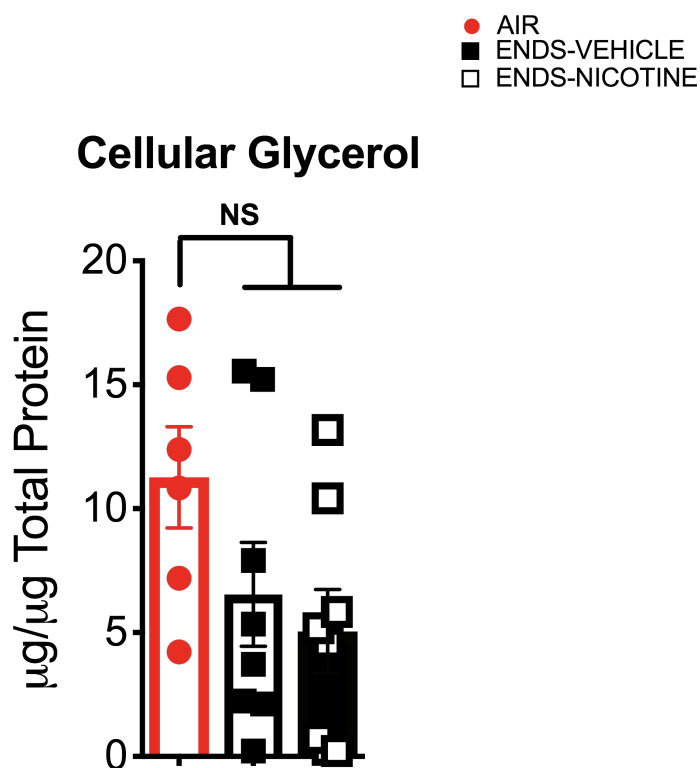

118  
119

120 **Supplemental Figure 4. BAL cells from ENDS-exposed mice do not accumulate glycerol following**  
121 **4-months of exposure.** Representative values acquired using a colorimetric detection assay for total  
122 glycerol. The quantified results are expressed as means  $\pm$  S.E.M. n=6 or n=8 per group. Significance was  
123 determined by One-way ANOVA with a Bonferroni correction for multiple comparisons.

124  
125  
126  
127  
128  
129  
130  
131  
132  
133  
134  
135  
136  
137  
138  
139  
140  
141

142 **Supplementary Figure 5.**  
143

**Immunohistochemistry for mouse LAMP-1**

**AIR**

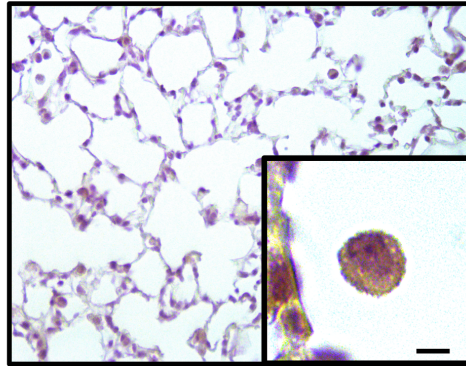

**ENDS-VEHICLE**

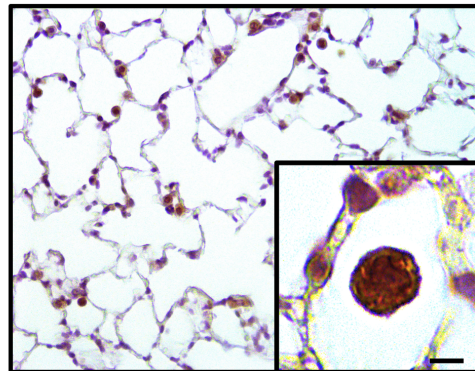

**ENDS-NICOTINE**

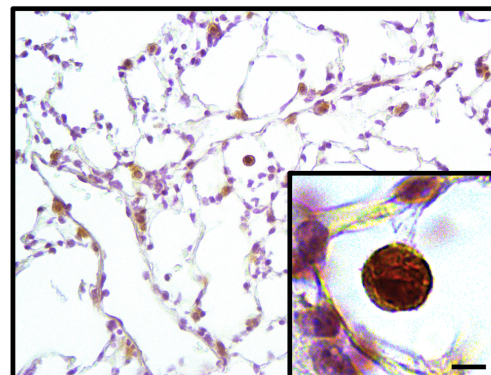

144  
145  
146 **Supplemental Figure 5. ENDS-exposed mice demonstrate stronger staining for lysosomal associated**  
147 **protein-1 (LAMP-1).** Representative micrographs of lung tissue from AIR, ENDS-Vehicle, and ENDS-  
148 Nicotine exposed mice. Five- $\mu$ m slices of tissue were immunohistochemically stained for LAMP-1 and  
149 subsequently counterstained with hematoxylin. Scale Bar: 20  $\mu$ m

150  
151  
152

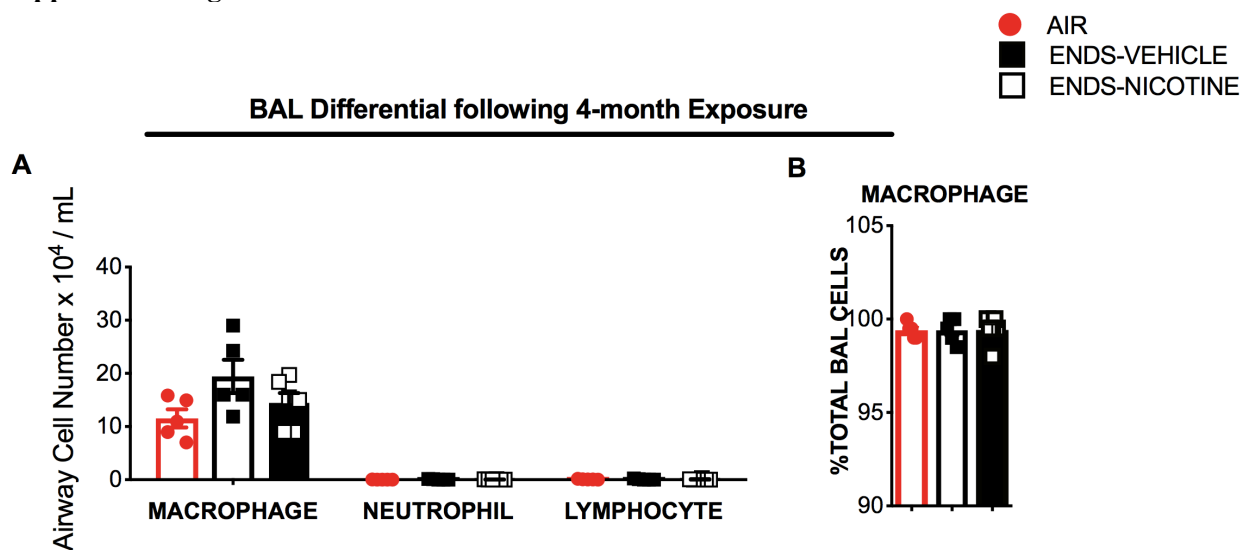

154 Supplemental Figure 6. BAL Cells from ENDS and Air-exposed are almost exclusively alveolar  
 155 macrophages. (A) Differential bronchoalveolar lavage cell numbers for macrophages, neutrophils, and  
 156 lymphocytes in the airway. n=5 per group. (B) Percentage of macrophage within the total BAL cell  
 157 population. n=5 per group.  
 158  
 159  
 160  
 161  
 162  
 163  
 164  
 165  
 166  
 167  
 168  
 169  
 170  
 171  
 172  
 173  
 174  
 175  
 176  
 177  
 178  
 179  
 180  
 181  
 182  
 183  
 184  
 185  
 186  
 187  
 188

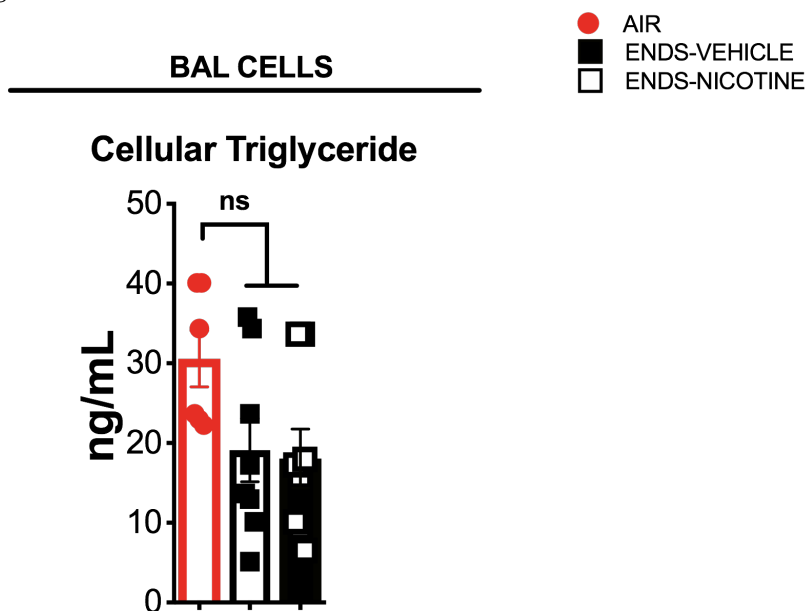

190  
191  
192 **Supplemental Figure 7. Triglycerides are not significantly altered by ENDS exposure. (A)** Total  
193 Triglyceride levels within BAL cells from mice exposed to AIR, ENDS-Vehicle, and ENDS-Nicotine for  
194 4 months. n=5 to 7 per group.

195  
196  
197  
198  
199  
200  
201  
202  
203  
204  
205  
206  
207  
208  
209  
210  
211  
212  
213  
214  
215  
216  
217  
218  
219  
220  
221



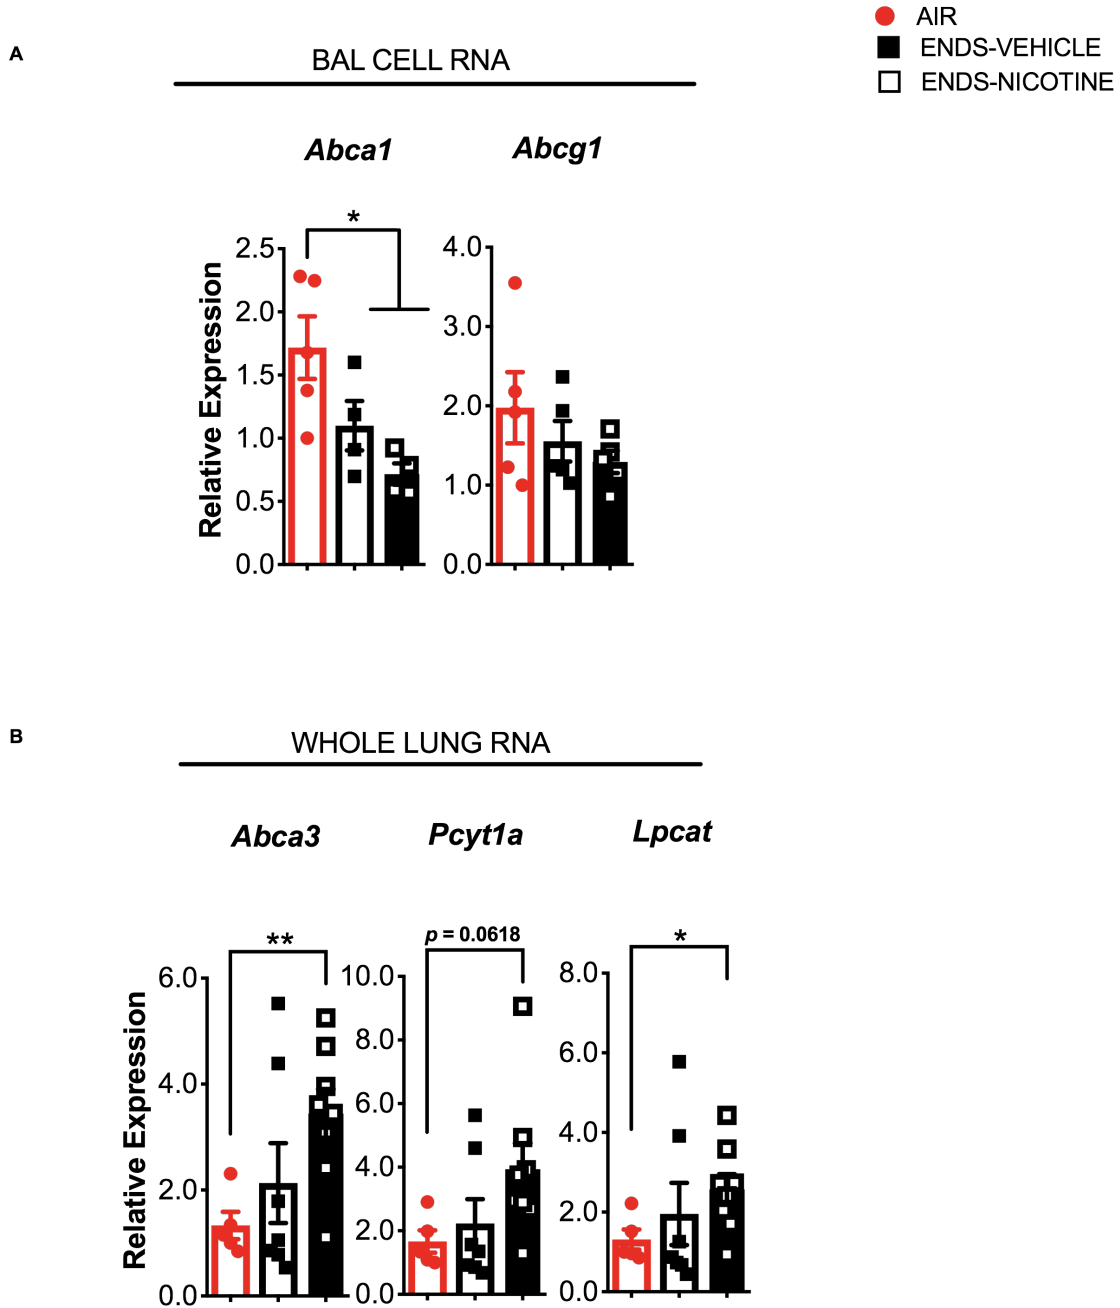

224  
 225 **Supplemental Figure 8. ENDS exposure alters the synthesis and handling of lipids in epithelial and**  
 226 **airway immune populations.** (A) Relative gene expression of lamellar body organizing protein,  
 227 ABCA3, and phosphatidylcholine-modifying enzymes, PCYT1A (CCT $\alpha$ ) and LPCAT. The quantified  
 228 results are expressed as means  $\pm$  S.E.M. n=6 or 7 per group. Significance was determined by Student's *t*  
 229 test. (B) Relative gene expression lipid efflux protein, ABCA1. The quantified results are expressed as  
 230 means  $\pm$  S.E.M. n=6 or 7 per group. Significance was determined by One-way ANOVA with a  
 231 Bonferroni correction for multiple comparisons. \*\* $P < 0.01$ , \* $P < 0.05$ .

233 Supplemental Figure 9.  
 234

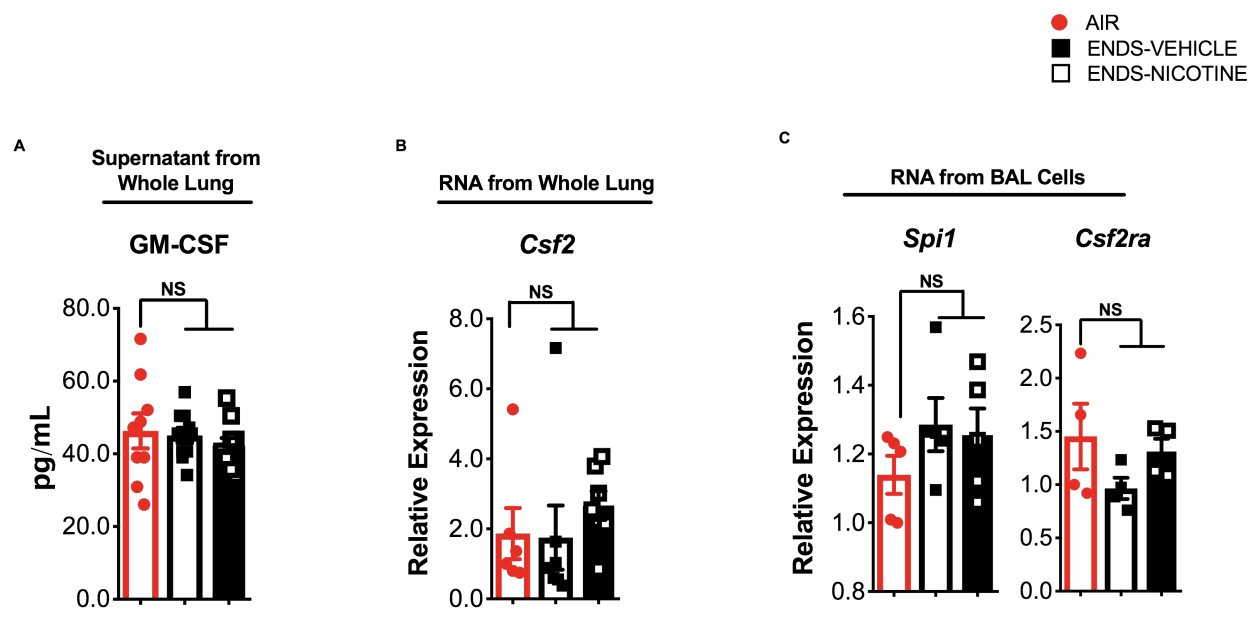

235  
 236 **Supplemental Figure 9. GM-CSF-related pathways are unaltered by ENDS exposure.** (A) Protein  
 237 concentrations of GM-CSF from whole lung homogenate supernate. (B) Relative gene expression of GM-  
 238 CSF's gene, *Csf2*, whole lung tissue. (C) Relative gene expression of GM-CSF receptor, *Csfra2*, and its  
 239 downstream transcription factor, *Spi1* (PU.1). The quantified results are expressed as means  $\pm$  S.E.M. n=4  
 240 per group. Significance was determined by One-way ANOVA with a Bonferroni correction for multiple  
 241 comparisons.

242  
 243  
 244  
 245  
 246  
 247  
 248  
 249  
 250  
 251  
 252  
 253  
 254  
 255  
 256  
 257  
 258  
 259  
 260  
 261  
 262  
 263  
 264  
 265

**BAL Cytospin Preparations Following 2-Week Exposure**

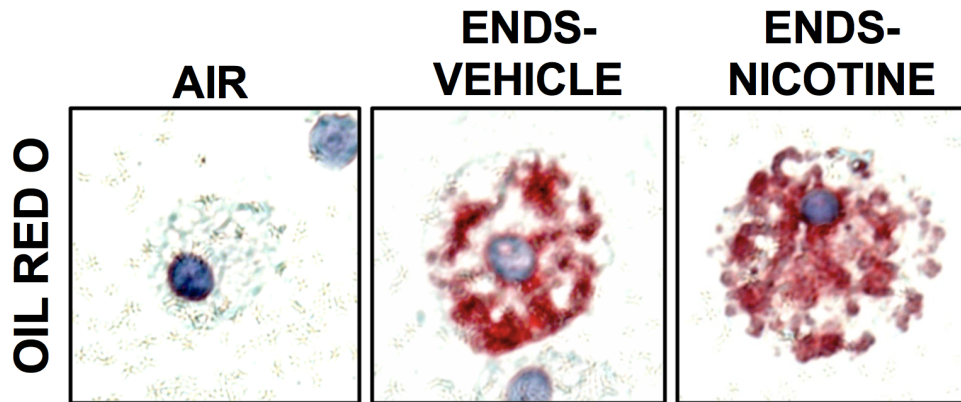

267

268 **Supplemental Figure 10. Lipid deposition in ENDS-exposed alveolar macrophages at 2-weeks of**  
269 **exposure.** Representative Oil Red O staining of cytopsin preparations of airway immune cells acquired  
270 by bronchoalveolar lavage from mice exposed to AIR, ENDS-VEHICLE, or ENDS-NICOTINE for 2  
271 weeks.

272  
273  
274  
275  
276  
277  
278  
279  
280  
281  
282  
283  
284  
285  
286  
287  
288  
289  
290  
291  
292  
293  
294  
295  
296  
297  
298  
299  
300

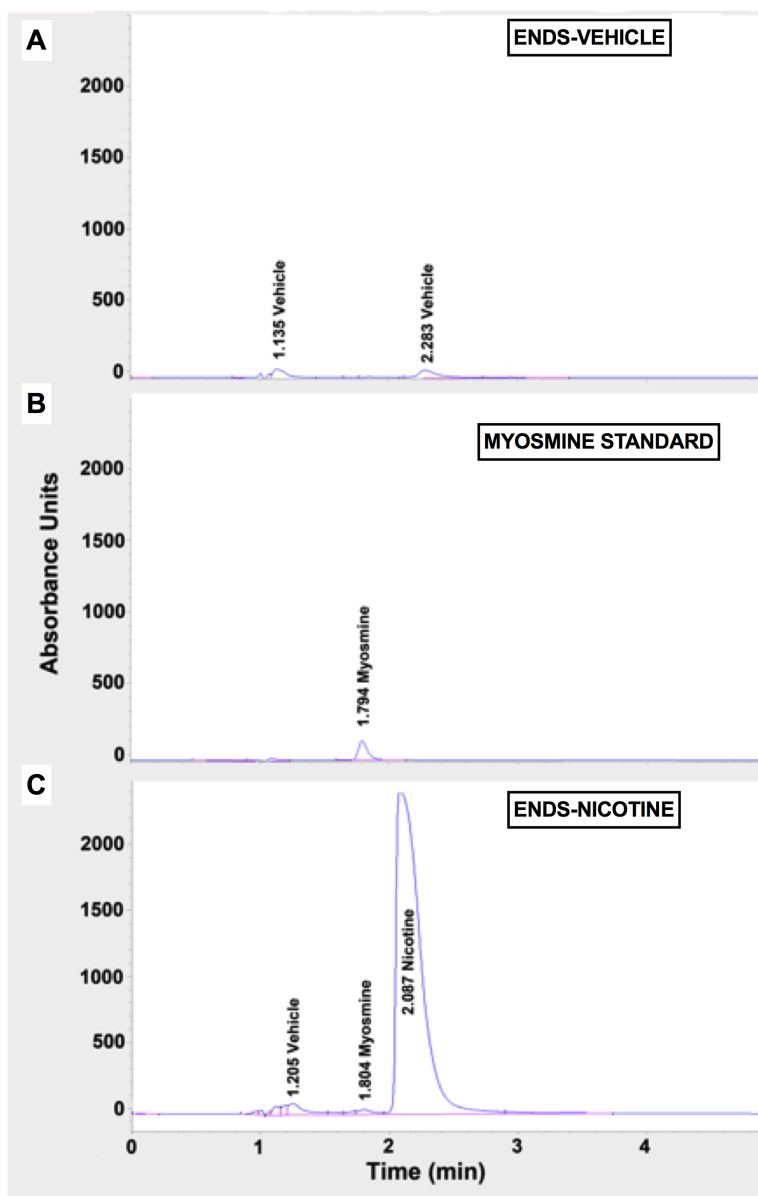

302

**303 Supplemental Figure 11. ENDS solutions did not contain anabasine or cotinine contaminants.**

304 Concentration and purity of the ENDS liquids were confirmed by high performance liquid  
305 chromatography (HPLC). Focus was placed on three major known contaminants, anabasine, myosmine  
306 and cotinine. Standards for nicotine tartrate (Sigma-Aldrich), myosmine (Alfa Aesar), anabasine (Tocris  
307 Biosciences), and cotinine (Alfa Aesar) were obtained from commercial vendors. (A) Only traces of the  
308 vehicle solvents (PG/VG) were detected in the ENDS-Vehicle E-Juice used in our study. Cotinine,  
309 myosmine, nicotine, or anabasine were not detected. (B) Mysomine standard used in the analyses. (C)  
310 Traces of the vehicle solvents and mysomine (24 and 73  $\mu\text{g}/\text{ml}$ , respectively) were detected along with  
311 nicotine in the ENDS-Nicotine E-Juice used in our study. Cotinine and anabasine were not detected.  
312 Analyses were performed on 2 E-Juice samples that were purchased at different time points from the  
313 same E-Juice vendor.

314

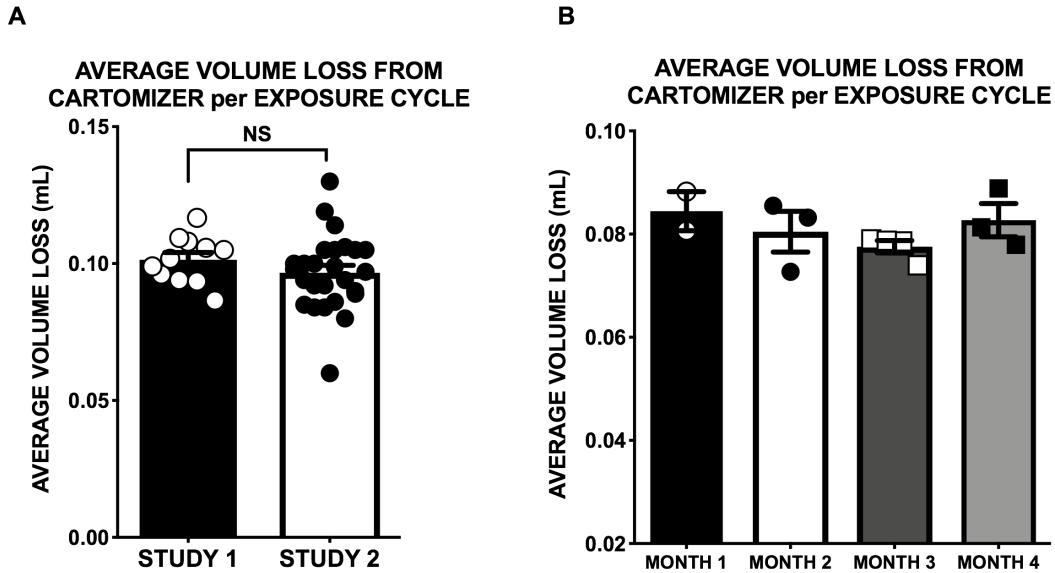

316  
317 **Supplemental Figure 12. E-Cigarette Analyses.** (A) Average volume loss of solvent (i.e. vapor  
318 produced) from the ENDS device determined weekly for two independent studies demonstrates the  
319 consistency of eCigarette from study to study. (B) Average volume loss of solvent (i.e., vapor produced)  
320 from the ENDS device determined weekly across a 4-month study demonstrates consistent vapor  
321 exposure throughout an independent study. The quantified results are expressed as means  $\pm$  S.E.M. n=2 to  
322 3 per group. Significance was determined by the Student's *t* test.

323  
324  
325  
326  
327  
328  
329  
330  
331  
332  
333  
334  
335  
336  
337  
338  
339  
340  
341  
342  
343  
344  
345  
346  
347  
348

349 Supplemental Figure 13.  
350

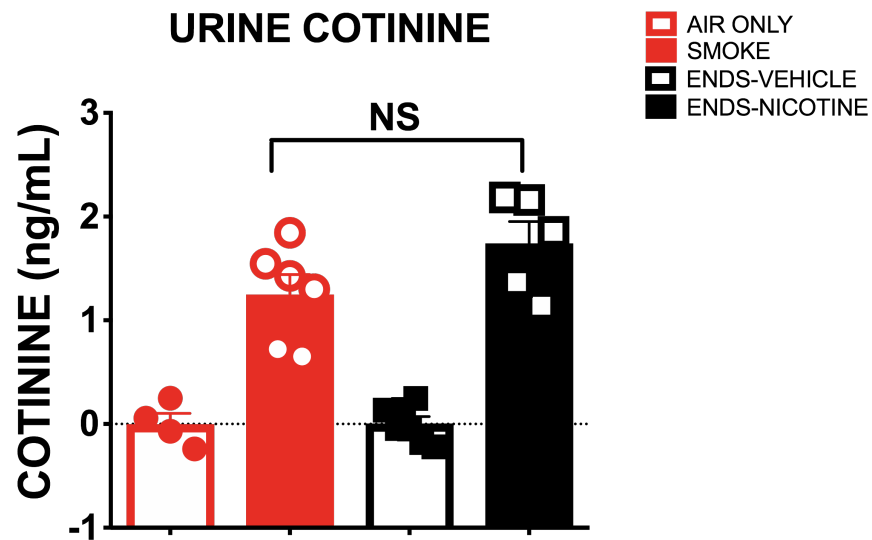

351

352 **Supplemental Figure 13. ENDS-Nicotine and Cigarette Smoke-exposed Mice receive equivalent**  
353 **nicotine exposure.** Cotinine, a downstream metabolite and surrogate marker for nicotine, concentration  
354 from the urine of mice exposed to AIR, SMOKE, ENDS-Vehicle, and ENDS-Nicotine, respectively, 18  
355 hours following exposure. The quantified results are expressed as means  $\pm$  S.E.M. n=4 to 7 per group.  
356 Significance was determined by the Student's *t* test.
